# Supplementary material
Source: Springer Nature journal article supplement (https://www.springermedizin.de/resource/supplementary/12888_2009_625_MOESM1_ESM.pdf/9483752)
Supplement: MOESM1 [file 9483752]

168 cases approached

**Cases**

- 9 were ineligible
- 7 cases refused to participate.
- Total 152 given SRQ-20 all 152 had a score of 8 or more on SRQ therefore selected as Cases.

208 controls approached

**Controls**

- 40 were screened positive for depression on SRQ-20 and were referred.
- 8 did not fulfill eligibility criteria.
- 8 refused to participate
- 152 selected as Controls
